1 **Genetic conflict with a parasitic nematode disrupts the legume-rhizobia**  
2 **mutualism**

3 Corlett W. Wood<sup>1,3</sup>, Bonnie L. Pilkington<sup>1,4</sup>, Priya Vaidya<sup>1,5</sup>, Caroline Biel<sup>1,6</sup>, and John R.  
4 Stinchcombe<sup>1,2,7</sup>

5

6 <sup>1</sup> Department of Ecology and Evolutionary Biology, University of Toronto, Toronto, Ontario  
7 M5S3B2, Canada

8 <sup>2</sup> Koffler Scientific Reserve, University of Toronto, Toronto, Ontario, M5S3B2, Canada

9 <sup>3</sup> Corresponding author. *Email:* corlett.wood@utoronto.ca

10 <sup>4</sup> *Email:* bonnie.pilkington@mail.utoronto.ca

11 <sup>5</sup> *Email:* p.vaidya@mail.utoronto.ca

12 <sup>6</sup> *Email:* caroline.biel@mail.utoronto.ca

13 <sup>7</sup> *Email:* john.stinchcombe@utoronto.ca

14

15 **Article type:** Letter

16 **Keywords:** *Medicago truncatula*, microbiome, *Meloidogyne hapla*, root-knot nematode, genetic  
17 correlation

18 **Running title:** Genetic conflict between mutualism and parasitism

19 **Abstract word count:** 237 words

20 **Total word count:** 5095 words

21 **Abstract**

22 Genetic variation for partner quality in mutualisms is an evolutionary paradox. One possible  
23 resolution to this puzzle is that there is a tradeoff between partner quality and other fitness-  
24 related traits. Here, we tested whether a susceptibility to parasitism is one such tradeoff in the  
25 mutualism between legumes and nitrogen-fixing bacteria (rhizobia). We performed two  
26 greenhouse experiments with the legume *Medicago truncatula*. In the first, we inoculated each  
27 plant with the rhizobia *Ensifer meliloti* and with one of 40 genotypes of the parasitic root-knot  
28 nematode *Meloidogyne hapla*. In the second experiment, we inoculated all plants with rhizobia  
29 and half of the plants with a genetically variable population of nematodes. Using the number of  
30 nematode galls as a proxy for infection severity, we found that plant genotypes differed in  
31 susceptibility to nematode infection, and nematode genotypes differed in infectivity. Second, we  
32 showed that there was a genetic correlation between the number of mutualistic structures formed  
33 by rhizobia (nodules) and the number of parasitic structures formed by nematodes (galls).  
34 Finally, we found that nematodes disrupt the rhizobia mutualism: nematode-infected plants  
35 formed fewer nodules and had less nodule biomass than uninfected plants. Our results  
36 demonstrate that there is genetic conflict between attracting rhizobia and repelling nematodes in  
37 *Medicago*. If genetic conflict with parasitism is a general feature of mutualism, it could account  
38 for the maintenance of genetic variation in partner quality and influence the evolutionary  
39 dynamics of positive species interactions.

40

## 41 **Impact summary**

42 Cooperative species interactions, known as mutualisms, are vital for organisms from plants to  
43 humans. For example, beneficial microbes in the human gut are a necessary component of  
44 digestive health. However, parasites often infect their hosts via mechanisms that are  
45 extraordinarily similar to those used by mutualists, which may create a tradeoff between  
46 attracting mutualists and resisting parasites. In this study, we investigated whether this tradeoff  
47 exists, and how parasites impact mutualism function in the barrelclover *Medicago truncatula*, a  
48 close relative of alfalfa. Legumes like *Medicago* depend on nitrogen provided by mutualistic  
49 bacteria (rhizobia) to grow, but they are also infected by parasitic worms called nematodes,  
50 which steal plant nutrients. Both microorganisms live in unique structures (nodules and galls) on  
51 plant roots. We showed that the benefits of mutualism and the costs of parasitism are predicted  
52 by the number of mutualistic structures (nodules) and the number of parasitic structures (galls),  
53 respectively. Second, we found that there is a genetic tradeoff between attracting mutualists and  
54 repelling parasites in *Medicago truncatula*: plant genotypes that formed more rhizobia nodules  
55 also formed more nematode galls. Finally, we found that nematodes disrupt the rhizobia  
56 mutualism. Nematode-infected plants formed fewer rhizobia nodules and less total nodule  
57 biomass than uninfected plants. Our research addresses an enduring evolutionary puzzle: why is  
58 there so much variation in the benefits provided by mutualists when natural selection should  
59 weed out low-quality partners? Tradeoffs between benefits provided by mutualists and their  
60 susceptibility to parasites could resolve this paradox.

## 61 **Introduction**

62           Nearly all species require mutualists to carry out crucial biological functions (Shapira  
63 2016). Insects partner with mutualists for nutrition (Hansen and Moran 2014; Nygaard et al.  
64 2016); most plants rely on mutualistic fungi or bacteria to grow (Friesen 2013; Busby et al.  
65 2017), and on animal pollinators for reproduction (Johnson et al. 2015); and the gut microbiome  
66 is increasingly recognized as a key aspect of human physiology (Sachs et al. 2011; Shapira  
67 2016). One common feature of most mutualisms is their abundant genetic variation in partner  
68 quality—the fitness benefits provided by one partner to another—despite the fact that natural  
69 selection is expected to erode variation in mutualism strategies over time (Heath and  
70 Stinchcombe 2014). Here we show that partner quality variation in the mutualism between plants  
71 and nitrogen-fixing bacteria may be maintained by a genetic tradeoff between attracting  
72 mutualistic bacteria and repelling parasitic nematodes.

73           The maintenance of genetic variation for partner quality in mutualisms is an evolutionary  
74 paradox (Heath and Stinchcombe 2014). As with other fitness-related traits, natural selection is  
75 expected to drive the highest-fitness partner strategy to fixation, eliminating low-fitness  
76 genotypes. Yet genetic variation in partner quality is ubiquitous (Smith and Goodman 1999;  
77 Ness et al. 2006; Heath 2010; Hoeksema 2010). Several hypotheses have been advanced to  
78 explain this pattern in mutualisms (Heath and Stinchcombe 2014), including the context  
79 dependence of partner quality (Barrett et al. 2012; Heath et al. 2012; Simonsen and Stinchcombe  
80 2014a; Burghardt et al. 2017; Harrison et al. 2017b) and frequency-dependent selection  
81 balancing cooperative and uncooperative mutualist genotypes (Porter and Simms 2014; Jones et  
82 al. 2015). By contrast, the alternative hypothesis that selection favors poor-quality mutualists

83 over high-quality mutualists under some ecological conditions (Bronstein 2001a,b) remains  
84 relatively understudied.

85 Parasites are one agent of selection with the potential to reverse selection on cooperative  
86 traits in mutualisms. Parasites can induce major changes in the function and benefits of  
87 mutualism, generally in two ways (Strauss and Irwin 2004). First, parasites disrupt the  
88 occurrence (i.e., change the frequency) of mutualistic partnerships, typically causing infected  
89 hosts to form fewer mutualistic associations (Strauss et al. 2002; De Román et al. 2011; Ballhorn  
90 et al. 2014). Second, if the same trait attracts both mutualists and parasites—for example, flowers  
91 that draw herbivores to plants along with pollinators—individuals experience a tradeoff between  
92 the benefits of mutualism and the costs of parasitism (Gomez 2003; Irwin et al. 2004; Siepielski  
93 and Benkman 2009; Ågren et al. 2013; Knauer and Schiestl 2017; Züst and Agrawal 2017).  
94 Coupled with spatial or temporal variation in parasite abundance, conflicting selection imposed  
95 by mutualists and parasites has been shown to maintain phenotypic variation in mutualism traits  
96 (Siepielski and Benkman 2009; Ågren et al. 2013).

97 We lack direct evidence, however, that tradeoffs between mutualism and parasitism are  
98 genetically based, a necessary criterion for selection imposed by parasites to contribute to the  
99 maintenance of genetic variation in mutualism (Strauss and Irwin 2004; Heath and Stinchcombe  
100 2014). Genetic trade-offs between mutualism and parasitism can preserve genetic variation in  
101 mutualist quality in at least two complementary ways. First, if the genotypes that form the most  
102 mutualistic associations (or provide the greatest benefit to their partners) necessarily suffer more  
103 parasitism, this may reduce or eliminate their fitness advantage, preventing or slowing the  
104 fixation of the ‘best’ mutualist genotypes in populations. Second, if mutualism and parasitism are  
105 genetically linked, correlated evolutionary responses may lead to temporally variable selection

106 on mutualism- and parasitism-related traits. That is, if selection favoring effective mutualists  
107 causes a correlated decrease in parasite resistance, eventually countervailing selection favoring  
108 increased parasite resistance is likely to drive a correlated decrease in mutualist quality, thus  
109 preserving variation in mutualism traits. In similar fashion, spatial variation in the abundance of  
110 mutualists or parasites can create a mosaic of correlated responses to selection in mutualism- or  
111 parasitism-related traits, preserving genetic variation at larger spatial scales. A genetic  
112 relationship between mutualism and parasitism traits is one precondition for these evolutionary  
113 forces contribute to the maintenance of genetic variation for partner quality in mutualisms.

114         Although we lack direct evidence for genetic tradeoffs between mutualism and parasitism  
115 in most systems, several lines of indirect evidence raise the intriguing possibility that  
116 susceptibility to parasites is a common pleiotropic genetic cost of mutualism. Many species are  
117 attacked by parasites that bear remarkable resemblance to their mutualists (Adams et al. 2012;  
118 Chomicki et al. 2015), and parasites and mutualists frequently use the same cues to infiltrate  
119 their host (Sachs et al. 2011). Host genes that affect interactions with mutualists are often also  
120 used in defense against parasites (Sachs et al. 2011; Damiani et al. 2012). Consistent with this  
121 observation, some species suppress immune function when establishing mutualistic partnerships,  
122 leaving them vulnerable to infection (Toth et al. 1990; Miller 1993; Salem et al. 2015).  
123 Ultimately, it remains unclear whether these mechanistic tradeoffs create genetic conflict  
124 between mutualism and parasitism at the population level, and whether there is genetic variation  
125 for the extent to which parasites influence mutualism structure and function.

126         The keystone ecological and agricultural mutualism between leguminous plants and  
127 nitrogen-fixing bacteria (rhizobia) is a promising system for testing for genetic tradeoffs between  
128 mutualism and parasitism. In this mutualism, rhizobia provide their plant host with nitrogen, and

129 the plant trades carbohydrates in return. Plants house rhizobia in root organs called nodules  
130 (Figure 1). However, many legumes are also infected by parasitic root-knot nematodes that steal  
131 photosynthates (Dhandaydham et al. 2008; Govere and Smant 2014). Nematodes form galls on  
132 plant roots that are strikingly similar to the nodules formed by rhizobia (Figure 1). Molecular  
133 genetic evidence suggests that genetic conflict between legume responses to mutualistic rhizobia  
134 and parasitic nematodes is extensive. Nematodes infiltrate the plant via a stereotyped infection  
135 process that mimics that of rhizobia (Govere and Smant 2014). Many of the same legume genes  
136 mediate the two interactions (e.g., receptor genes required to initiate infection) (Koltai et al.  
137 2001; Weerasinghe et al. 2005; Dhandaydham et al. 2008; Damiani et al. 2012). Finally,  
138 nematodes have acquired several parasitism genes via horizontal gene transfer from close  
139 relatives of rhizobia (Danchin et al. 2010, 2016).

140 In this report we describe a genetic conflict between plant responses to mutualistic  
141 rhizobia and parasitic nematodes in the model legume *Medicago truncatula*. Using two  
142 greenhouse-based inoculation experiments, we addressed four questions: (1) How do rhizobia  
143 and nematodes impact fitness in co-infected plants?; (2) Is there genetic variation in plant  
144 susceptibility to nematodes?; (3) Is there genetic conflict between plant responses to mutualistic  
145 rhizobia and parasitic nematodes?; and (4) How do parasitic nematodes impact the rhizobia  
146 mutualism? We found a genetic tradeoff between attracting rhizobia and repelling nematodes,  
147 and that nematodes disrupt the legume-rhizobia mutualism by deterring nodulation. Our results  
148 suggest that genetic conflict with nematodes may maintain variation in partner quality in the  
149 legume-rhizobia mutualism, and that genetic tradeoffs with parasitism may be an important  
150 overlooked source of variation in positive species interactions.

151

152 **Methods**

153 *Study species*

154 *Medicago truncatula* is an annual plant native to the Mediterranean (Cook 1999).  
155 Because nodule number is correlated with rhizobia fitness in *M. truncatula* (Heath and Tiffin  
156 2009), it can be used as a proxy for *M. truncatula*'s partner quality (i.e., the benefits it provides)  
157 in the rhizobia mutualism. The *M. truncatula* accessions used for this study came from the  
158 French National Institute for Agricultural Research (INRA), and the US National Plant  
159 Germplasm System (NPGS) Western Regional Plant Introduction Station. For rhizobia  
160 inoculations, we used the *E. meliloti* strain Em1022, a highly effective nitrogen-fixer, supplied  
161 by (Batstone et al. 2016). We obtained soil infected with the northern root-knot nematode  
162 *Meloidogyne hapla* from Dr. Benjamin Mimee (Agriculture and Agri-food Canada, Saint-Jean-  
163 sur-Richelieu, Quebec), and maintained these nematodes on tomato plants (cv. Rutgers) in  
164 growth chambers and greenhouses at the University of Toronto.

165

166 *Greenhouse experiments*

167 We performed two greenhouse experiments to investigate genetic conflict between *M.*  
168 *truncatula*'s response to mutualistic rhizobia and parasitic nematodes. In both experiments, we  
169 scarified *M. truncatula* seeds with a razor blade, sterilized them in bleach and ethanol, and  
170 stratified them in the dark at 4°C for 36 hours on sterile water agar plates (Garcia et al. 2006).  
171 We incubated seeds at room temperature for 16 hours before planting to initiate radicle  
172 elongation. We planted the seedlings into sand in 120ml autoclavable Cone-tainers, autoclaved  
173 twice at 121°C, and maintained seedlings in the greenhouse at the University of Toronto at 22°C



174 during the day and 18°C at night, on a 16:8 light:dark cycle. We top-watered seedlings with  
175 distilled water for two weeks, and bottom-watered them for the remainder of the experiments.

176 Two weeks after germination, we inoculated seedlings with the rhizobium *E. meliloti* and  
177 the nematode *M. hapla*. We cultured rhizobia strain Em1022 on solid tryptone yeast (TY) agar  
178 media, re-plated colonies three times, and inoculated liquid TY media with these cultures. We  
179 diluted liquid cultures to an OD600 reading of 0.1, following previous methods (Simonsen and  
180 Stinchcombe 2014b), and inoculated each plant with 1mL of culture at two and three weeks post-  
181 germination. We inoculated plants with nematode eggs at the same time. To harvest nematode  
182 eggs from infected tomato plants for inoculation, we followed a bleach extraction protocol  
183 (Eisenback 2000). Female nematodes lay several hundred eggs into a gelatinous matrix on the  
184 outside of each gall (Maggenti and Allen 1960). We rinsed the roots of infected tomato plants  
185 and incubated them in a shaker at room temperature for 5 minutes in 10% commercial bleach  
186 (0.5% NaOCl) to dissolve the gelatinous matrix binding the eggs together. We poured the  
187 solution through a series of mesh soil sieves, collected nematode eggs on a #500 mesh sieve  
188 (25µm pore size), and stored collected eggs in distilled water in Falcon tubes. We inoculated  
189 each plant with nematode eggs twice (at two and three weeks post-germination), on the same  
190 schedule as the rhizobia inoculations.

191 *Experiment 1:* To test how rhizobia and nematodes impact fitness in co-infected plants,  
192 and to measure genetic variation in nematode infectivity, we used a fractional factorial design  
193 with a total of 400 *M. truncatula* plants from 10 genotypes across 10 blocks. We inoculated each  
194 plant with 1 of 40 nematode genotypes. Each block included 4 replicates of each plant genotype  
195 and 1 replicate of each nematode genotype, for a total of 40 replicates of each plant genotype and

196 10 replicates of each nematode genotype. Each nematode genotype inoculated 2 different plant  
197 genotypes, for a total of 5 replicates per nematode genotype-plant genotype combination.

198 To culture individual nematode genotypes, we inoculated tomatoes with second-stage  
199 juvenile (J2) nematodes from individual egg masses (Thies et al. 2002). This protocol ensured  
200 that each tomato plant was infected by a single maternal family. After approximately three  
201 months, we extracted nematode eggs from these tomatoes and used them to inoculate our  
202 experimental plants. We inoculated each plant with ~200-400 nematode eggs, depending on  
203 availability, and included number of eggs as a covariate in our statistical analyses. Nine plants  
204 received >400 eggs; excluding these plants from the analysis did not qualitatively affect our  
205 results. We harvested plants 3.5 months after planting.

206 *Experiment 2:* To measure genetic conflict between attracting rhizobia and repelling  
207 nematodes, and to test how parasitic nematodes impact the rhizobia mutualism, we used a split-  
208 plot randomized design. Each block contained two treatments: one in which we only inoculated  
209 plants with rhizobia, and one in which we inoculated plants with both rhizobia and nematodes.  
210 Plants received a total of 400 nematode eggs from a genetically variable nematode inoculum.  
211 Each treatment in each block contained one *M. truncatula* individual from each of 50 genotypes.  
212 In each block, we bottom-watered all plants in the same treatment from the same tray. We  
213 replicated this design across 10 blocks (50 plants per treatment per block  $\times$  2 treatments  $\times$  10  
214 blocks = 1000 plants). We did not include a nematode-only treatment because *Medicago* grows  
215 poorly under nitrogen-poor conditions without rhizobia (Harrison et al. 2017a). We harvested  
216 plants 4.5 months after planting.

217 We checked flowering and collected ripe fruit daily throughout both experiments. Upon  
218 harvesting the plants, we stored the roots at 4°C in zip-top plastic bags until processing. We

219 dried the aboveground tissue in a drying oven for approximately 1 week and weighed it to the  
220 nearest 1mg. We weighed all fruit each plant produced to measure total fruit mass. To verify that  
221 fruit mass was an accurate measurement of reproductive success, we measured the correlation  
222 between fruit mass and seed number for a subset of plants (N = 167) and found that fruit mass  
223 and seed number were tightly correlated ( $r = 0.76$ ,  $P < 0.001$ ,  $df = 165$ ). We counted the number  
224 of nodules and galls on each root system under a dissecting microscope. To capture differences  
225 in nodule size, we haphazardly harvested up to ten of the largest nodules on each plant. Nodules  
226 were stored in 2mL tubes containing silica desiccant and synthetic polyester for a month until  
227 they dried out, and we weighed the dried nodules collected from each plant to the nearest 1 $\mu$ g.  
228 We estimated total nodule biomass for each plant by multiplying total nodule number by mean  
229 nodule mass. After counting nodules and galls and harvesting nodules, we dried the roots in a  
230 drying oven for approximately 1 week and weighed them to the nearest 1mg.

231

### 232 *Statistical analyses*

233 We performed all analyses in R 3.3.2 with deviation coding ("contr.sum") for categorical  
234 variables (R Core Team 2016). Unless stated otherwise, we ran all analyses with the *(g)lmer*  
235 function in the *lme4* package (Bates et al. 2015). We tested significance of fixed effects with type  
236 III sums of squares using the *Anova* function in the *car* package (Fox and Weisberg 2011), and  
237 used likelihood ratio tests to test significance of random effects (Bolker et al. 2009). We  
238 confirmed that all models met the parametric statistical assumptions of normality,  
239 homoscedasticity, and linearity by inspecting quantile-quantile plots, scale-location plots, and  
240 plots of the residuals versus fitted values, respectively. We also checked for overdispersion by  
241 testing whether the ratio of the residual variance to the residual degrees of freedom was equal to

242 1. We calculated least-squares treatment and genotype means using the *lsmeans* package (Lenth  
243 2016) and created figures using *ggplot2* (Wickham 2009).

244

245 *Effect of rhizobia and nematodes on fitness in co-infected plants (Experiment 1)*

246 To test how rhizobia and nematodes impact fitness in co-infected plants, we analyzed two  
247 fitness components, aboveground biomass and total fruit mass. These models included number of  
248 nodules, number of galls, root mass, researcher (to control for differences among researchers in  
249 nodule and gall counts), and the number of nematode eggs in the inoculum as fixed effects, and  
250 block as a random effect. We log-transformed aboveground biomass for analysis. We included a  
251 fixed effect of root mass in this and subsequent analyses to control for differences in overall root  
252 system size and foraging ability, as well as differences in the root space available for the  
253 formation of symbiotic structures (i.e., nodules and galls).

254

255 *Genetic variation in plant susceptibility to nematodes (Experiments 1 and 2)*

256 In Experiment 1, we tested for genetic variation in infectivity among nematode  
257 genotypes, and for a plant genotype-by-nematode genotype interaction. A genotype-by-genotype  
258 interaction for gall number would indicate that the number of galls formed depends on the  
259 combination of plant and nematode genotypes. In this analysis, we included random effects of  
260 plant genotype, nematode genotype, plant genotype  $\times$  nematode genotype, and block. We  
261 included fixed effects of root mass, researcher (to control for differences among researchers in  
262 gall counts), and the number of nematode eggs in the inoculum. We log-transformed gall number  
263 for this analysis because the log transformation met parametric statistical assumptions much  
264 better than a Poisson or negative binomial GLMM. When testing for the genotype-by-genotype

265 interaction, we excluded plant genotype-nematode genotype combinations with fewer than three  
266 replicates.

267 In Experiment 2, we tested for genetic variation in plant susceptibility to nematodes by  
268 testing for significant variation among plant genotypes in the number of galls they produced.  
269 This analysis included fixed effects of root mass and researcher (to control for differences among  
270 researchers in gall counts), and random effects of plant genotype and block. Gall number was  
271 zero-inflated and overdispersed, so we fit a zero-inflated negative binomial GLMM using the R  
272 package *glmmADMB* (Fournier et al. 2012).

273

#### 274 *Genetic conflict between attracting rhizobia and repelling nematodes (Experiment 2)*

275 To test for genetic conflict between plant responses to mutualistic rhizobia and parasitic  
276 nematodes, we estimated the genetic correlation between nodule number and gall number. To  
277 estimate genotype means for gall number, we extracted the conditional modes of the genotype  
278 random effect from a model that included fixed effects of root mass and researcher, and random  
279 effects of genotype and block. Because we found evidence that nematodes disrupt the mutualism  
280 by inhibiting nodulation (see Results), we use estimates of nodulation from the rhizobia-only  
281 treatment to estimate the genetic correlation with gall formation. We estimated genotype means  
282 for nodule number using a model similar to the gall model, and specified a negative binomial  
283 error distribution and allowed for zero inflation in both models.

284 We also estimated the genetic correlation between gall number and the change in nodule  
285 number between the two treatments. We estimated genotype means for nodule number in  
286 nematode-infected plants using a similar model to the one used to estimate nodule number in the  
287 rhizobia-only treatment. We subtracted the genotype mean for nodule number in nematode-

288 infected plants from the genotype mean for nodule number in uninfected plants to calculate the  
289 change in nodule number for each genotype.

290

291 *Effect of nematodes on the rhizobia mutualism (Experiment 2)*

292 To test how parasitic nematodes impact the rhizobia mutualism, we compared nodule  
293 number, mean nodule mass, and total nodule biomass between nematode-infected and uninfected  
294 plants. These analyses included treatment (nematode presence or absence) and root mass as fixed  
295 effects, and random effects of genotype, block, treatment  $\times$  genotype and treatment  $\times$  block. The  
296 treatment  $\times$  block interaction is necessary when analyzing split-plot experiments to allow the  
297 effect of nematode treatment to vary across blocks (Altman and Krzywinski 2015). We specified  
298 a negative binomial error distribution for nodule number and allowed for zero inflation using the  
299 function *glmmadmb* in the R package *glmmADMB* (Fournier et al. 2012), and log-transformed  
300 mean nodule mass and total nodule biomass for analysis. The nodule number analysis included a  
301 fixed effect of researcher to control for researcher differences in nodule counts.

302 We ran similar analyses to compare aboveground biomass, flowering time, and total fruit  
303 mass between nematode-infected and -uninfected plants. We log-transformed all three variables  
304 for analysis, and omitted the fixed effect of root mass. For flowering time and total fruit mass,  
305 we analyzed a subset of genotypes (N = 22) with at least three replicates that flowered and  
306 fruited in each treatment, to test for treatment  $\times$  genotype interactions.

307

## 308 **Results**

309 *Effect of rhizobia and nematodes on fitness in co-infected plants (Experiment 1)*

310 Rhizobia and nematodes affected different fitness components in co-infected plants  
311 (Figure 2). Plants that formed more nodules had significantly greater aboveground biomass than  
312 plants with fewer nodules ( $\chi^2_{df=1} = 33.918$ ,  $P < 0.001$ ; Figure 2A). There was no corresponding  
313 effect of gall number on aboveground biomass ( $\chi^2_{df=1} = 0.370$ ,  $P = 0.543$ ; Figure 2B). By  
314 contrast, the number of nodules did not significantly affect the total fruit mass that plants  
315 produced ( $\chi^2_{df=1} = 0.490$ ,  $P = 0.484$ ; Figure 2C), but plants with more galls produced less total  
316 fruit mass than plants with fewer galls ( $\chi^2_{df=1} = 9.394$ ,  $P = 0.002$ ; Figure 2D).

317

### 318 *Genetic variation in plant susceptibility to nematodes (Experiments 1 and 2)*

319 In both experiments, there was significant variation among plant genotypes in the number  
320 of galls formed (controlling for root biomass) (Experiment 1:  $N_{\text{genotypes}} = 10$ ,  $P = 0.001$ ;  
321 Experiment 2:  $N_{\text{genotypes}} = 48$ ,  $P < 0.001$ ), indicating that there is genetic variation in plant  
322 susceptibility to nematode infection. In addition, there was significant variation in gall number  
323 among nematode genotypes in Experiment 1 ( $N_{\text{genotypes}} = 40$ ,  $P < 0.001$ ). There was no  
324 significant plant genotype  $\times$  nematode genotype interaction ( $N_{\text{plant-nematode combinations}} = 74$ ,  $P =$   
325  $0.539$ ).

326

### 327 *Genetic conflict between attracting rhizobia and repelling nematodes (Experiment 2)*

328 There was a significant positive correlation between gall number and the number of  
329 nodules produced in the absence of nematodes ( $r = 0.30$ ,  $P = 0.039$ ; Figure 3A). This correlation  
330 disappeared when the outlier genotype HM170, which formed 2.9 standard deviations more  
331 nodules than the mean in our experiment, was included in the analysis ( $r = 0.06$ ,  $P = 0.710$ ). In  
332 another study of nodulation in *M. truncatula*, this genotype also formed more nodules than 90%

333 of 250 accessions surveyed (Stanton-Geddes et al. 2013a,b). Together, our results and those of  
334 Stanton-Geddes et al. suggest that this genotype may be a biological outlier with respect to the  
335 rhizobia mutualism, so we ran subsequent analyses with and without this outlier genotype.

336         There was no significant genetic correlation between gall number and the number of  
337 nodules produced in the presence of nematodes, regardless of whether the outlier genotype  
338 HM170 was included in the analysis (with HM170:  $r = -0.20$ ,  $P = 0.153$ ; without HM170:  $r =$   
339  $0.04$ ,  $P = 0.789$ ). However, there was a significant positive genetic correlation between gall  
340 number and the change in nodule number between the two treatments ( $r = 0.31$ ,  $P = 0.034$ ;  
341 Figure 3B), indicating that plant genotypes that were most susceptible to nematodes (i.e., formed  
342 the most galls) decreased the most in nodule number when infected with nematodes. Excluding  
343 HM170 did not qualitatively change this result ( $r = 0.29$ ,  $P = 0.052$ ).

344

#### 345 *Effect of nematodes on the rhizobia mutualism (Experiment 2)*

346         Nematode-infected plants produced fewer nodules and less total nodule biomass than  
347 uninfected plants, although mean nodule mass did not differ between infected and uninfected  
348 plants (Table 1, Figure 4A-C). There was a significant effect of plant genotype for all nodule  
349 traits (Table 1), indicating that genotypes differed in mutualism phenotypes. We detected a  
350 significant treatment  $\times$  genotype interaction for nodule number and a marginally significant  
351 treatment  $\times$  genotype interaction for total nodule biomass (Table 1, Figures 4D & 4F). These  
352 interactions indicate that plant genotypes differed in how nodule traits were impacted by  
353 nematode infection. There was no treatment  $\times$  genotype interaction for mean nodule mass (Table  
354 1, Figure 4E). Our results were qualitatively similar when we removed the outlier genotype  
355 HM170 (see Figure 4D).



356 Other plant traits were not strongly affected by nematode infection. Although there was  
357 significant genetic variation for all plant traits, there was no difference between infected and  
358 uninfected plants in aboveground biomass, flowering time, or total fruit mass (Table 2). There  
359 was a marginally significant treatment  $\times$  genotype interaction for aboveground biomass (Table  
360 2).

361

## 362 **Discussion**

363 Here we showed that an ecologically relevant parasite disrupts the mutualism between  
364 leguminous plants and nitrogen-fixing rhizobial bacteria. *Medicago truncatula* plants that were  
365 infected by parasitic nematodes formed fewer rhizobia nodules and less nodule biomass per gram  
366 of root tissue than uninfected plants. Strikingly, nematode infection impacted nodule traits more  
367 strongly than other plant phenotypes, indicating that the parasite's effect on the legume-rhizobia  
368 mutualism is not merely a byproduct of lower overall performance in infected plants. Moreover,  
369 we found that a plant's affinity for rhizobia and susceptibility to nematodes were genetically  
370 correlated: plants that formed more nodules with rhizobia were more heavily infected by  
371 nematodes. Our results suggest that genetic conflict with parasitic nematodes is an important  
372 factor shaping the *Medicago*-rhizobia mutualism. If genetic conflict with parasitism is a general  
373 feature of many mutualisms, it may contribute to the maintenance of genetic variation for partner  
374 quality and influence evolution in positive species interactions.

375

### 376 *Nematodes decrease associations between Medicago and mutualistic rhizobia*

377 Our work extends past research on the impact of antagonists on mutualism in two key  
378 ways. First, we showed that mutualism traits were more strongly impacted by parasite infection

379 than other aspects of plant performance. In the presence of nematodes, plants formed fewer  
380 associations with mutualistic rhizobia. We found that nematode-infected *Medicago* plants  
381 formed 23% fewer nodules and 19% less total nodule biomass per gram of root than uninfected  
382 plants (Figure 4A-C). By contrast, nematode infection only weakly affected aboveground  
383 biomass, flowering time, and total fruit mass (Tables 1 and 2). Future work in other mutualisms  
384 should explore whether elevated sensitivity to parasites is a characteristic feature of mutualism  
385 traits.

386         Second, when ecological factors influence mutualistic associations, their evolutionary  
387 consequences depend on whether there is standing genetic variation for environmental  
388 responsiveness in the form of genotype-by-environment interactions. Although environmental  
389 effects on mutualism are common (Bronstein 1994; Bronstein et al. 2003; Kersch and Fonseca  
390 2005; Afkhami et al. 2014), and antagonists often interfere with the fitness benefits of mutualists  
391 (Gomez 2005; Liere and Larsen 2010; Simonsen and Stinchcombe 2014a), these effects are  
392 rarely investigated from a genetic perspective (but see (Heath et al. 2010)).

393         Our results demonstrate that there is standing genetic variation for *Medicago's*  
394 susceptibility to parasite infection, as well as in the degree to which the plant's mutualism was  
395 robust to parasite-mediated disruption (treatment  $\times$  genotype interaction: Table 1 and Figure 4D-  
396 F). *Medicago truncatula* genotypes varied significantly in their susceptibility to nematode  
397 infection, with some genotypes forming dozens or hundreds of galls while others formed few or  
398 none. Moreover, while some plant genotypes formed substantially fewer nodules when infected  
399 by nematodes, others—including one hyper-nodulating outlier (Figure 4D)—were largely  
400 unaffected by the parasite. The degree to which the *Medicago*-rhizobia mutualism is impacted by  
401 parasitic nematodes therefore has the genetic capacity to evolve. There was also genetic variation

402 in infectivity in the nematode population (i.e., nematode genotypes differed in the number of  
403 galls they formed on plant roots), demonstrating that both the plant and the parasite have the  
404 genetic capacity to evolve in response to the other. However, we found no evidence for  
405 genotype-by-genotype interactions between plants and nematodes that would facilitate  
406 coevolution in the system.

407

408 *Genetic tradeoff between attracting a mutualist and repelling a parasite*

409 *Medicago truncatula's* susceptibility to nematode infection was genetically correlated  
410 with its affinity for mutualistic rhizobia (Figure 3A). Plant genotypes that formed the most  
411 rhizobia nodules also formed the most galls, while genotypes that formed few nodules were more  
412 resistant to nematode infection. One caveat to this result is that the genetic correlation was no  
413 longer significant when the hyper-nodulating outlier genotype was included (Figure 3A). This  
414 outlier appears to be behaving fundamentally differently with respect to the rhizobia mutualism,  
415 and may be an informative point of comparison for future work on the genomic underpinnings of  
416 the genetic correlation between nodulation and galling.

417 The genetic correlation between attracting rhizobia and repelling nematodes in *Medicago*  
418 is consistent with molecular genetic work in the legume *Lotus japonicus* showing that mutants  
419 that do not form nodules are also resistant to nematode infection (Weerasinghe et al. 2005). To  
420 our knowledge, only a handful of past studies have documented genetic conflict between  
421 mutualism and parasitism (Toth et al. 1990; Miller 1993). Both examined the symbiosis between  
422 plants and mycorrhizal fungi, and found pathogen-resistant genotypes formed fewer mycorrhizal  
423 associations. Genetic conflict may be a general feature of intimate symbioses like plant-microbe  
424 mutualisms, in which one partner lives inside the tissue of another.

425           A genetic correlation underlying the tradeoff between attracting mutualists and repelling  
426 parasites, like the one we documented in *M. truncatula*, is one mechanism that can contribute to  
427 the maintenance of genetic variation for partner quality in mutualisms (Heath and Stinchcombe  
428 2014) and alter evolutionary trajectories (Nuismer and Doebeli 2004; Strauss and Irwin 2004).  
429 The genetic tradeoff between mutualism and parasitism has distinct evolutionary consequences  
430 for mutualism at different spatial and temporal scales. First, within a single population, as more  
431 mutualistic genotypes spread, susceptibility to parasites is also spreading: eventually, this should  
432 erode, or eliminate the fitness advantage gained by being a better mutualist partner, slowing or  
433 preventing their fixation. Second, variation in mutualist and parasite abundance among sites or  
434 years is likely to create a selection mosaic that favors high-quality partners where parasites are  
435 absent and low-quality partners where parasites are absent. Such spatial and temporal variation in  
436 the direction of selection and could maintain genetic variation for partner quality in mutualism  
437 (Thompson 2005; Huang et al. 2015). To directly assess how the genetic tradeoffs we report  
438 influences selection on, and variation in, partner quality in the legume-rhizobia mutualism, future  
439 work should characterize spatial and temporal variation in nematode and rhizobia abundance in  
440 wild *Medicago* populations.

441           Although there are surprisingly few estimates of the genetic tradeoff between mutualism  
442 and antagonism, widespread tradeoffs at the phenotypic level suggest that genetic conflict  
443 between positive and negative species interactions may be extremely common. For example,  
444 trypanosomatid parasites of firebugs mimic the vertical transmission mechanisms of their host's  
445 bacterial symbionts, such that symbiont transmission is associated with a risk of parasite  
446 infection (Salem et al. 2015). In the seed dispersal mutualism between Clark's nutcracker and  
447 pine trees, selection exerted by a seed predator opposes mutualist-mediated selection (Siepielski

448 and Benkman 2009). Pollinators and herbivores often cue in on the same plant signals, imposing  
449 conflicting selection on floral displays that weakens the overall strength of pollinator-mediated  
450 selection (Rey et al. 2002; Gomez 2003; Schiestl et al. 2011, 2014; Ågren et al. 2013; Knauer  
451 and Schiestl 2017). If these phenotypic tradeoffs are underpinned by genetic correlations like the  
452 correlation we report in the legume-rhizobia mutualism, genetic conflict with parasitic  
453 interactions is likely an important source of genetic variation in diverse mutualistic systems  
454 (Bronstein 2001a; Strauss and Irwin 2004).

455

#### 456 *Implications for mutualism evolution*

457 Our study joins a number of others demonstrating that an evolutionary genetic approach  
458 to mutualism can yield meaningful new insights about these positive species interactions (Heath  
459 2010; Heath et al. 2012; Afkhami and Stinchcombe 2016; Burghardt et al. 2017). A recent  
460 transcriptomic study of the legume-rhizobia mutualism, for example, showed that genotype-by-  
461 genotype interactions between plants and rhizobia impact carbon and nitrogen exchange, the  
462 central function of the symbiosis (Burghardt et al. 2017). Intriguingly, Burghardt et al. (2017)  
463 also found significant variation among plant genotypes in the expression of defense genes in  
464 nodules. Together, our study and theirs raise the possibility that conflict with plant immunity is a  
465 key feature of the legume-rhizobia mutualism whose evolutionary significance has been largely  
466 overlooked.

467 Genetic conflict with parasites could significantly alter the rate and trajectory of  
468 evolution in mutualisms. The impact of this conflict on mutualism evolution depends on three  
469 factors about which little is known in any system: the degree of overlap in the genetic pathways  
470 controlling the two symbioses; how parasites disrupt mutualistic partnerships; and the ecological

471 factors that mediate conflict. All three of these factors warrant further study in the legume-  
472 rhizobia mutualism, and a diverse array of other positive species interactions.

473

#### 474 **Acknowledgements**

475 We are grateful to Benjamin Mimee at Agriculture and Agri-food Canada for providing  
476 nematode inoculum, and Dennis VanDyk at the University of Guelph's Muck Crops Research  
477 Station for providing tomato cv. Rutgers seeds and advice on nematode culturing. Rebecca  
478 Batstone provided the rhizobia strain Em1022 used in these experiments, as well as advice on  
479 experimental protocols. Thanks to Bill Cole, Andrew Petrie, and Bruce Hall for greenhouse  
480 assistance, and Amalia Caballero, Monina Cepeda, Lily He, and Diana Nakib for help with data  
481 collection. This work was funded by an NSERC grant to John Stinchcombe and a University of  
482 Toronto EEB Postdoctoral Fellowship to Corlett Wood.

483

#### 484 **Author contributions**

485 CW and JS conceived of the study, and CW, BP, PV and JS designed the experiments. CW, BP,  
486 PV, and CB performed the experiments and collected data. All authors contributed to data  
487 analysis and interpretation. CW wrote the initial draft of the manuscript, and all authors  
488 contributed to manuscript revisions.

489

#### 490 **Data accessibility**

491 Data from both experiments will be available on Dryad.

492

## 493 References

- 494 Adams, R. M., K. Shah, L. D. Antonov, and U. G. Mueller. 2012. Fitness consequences of nest  
495 infiltration by the mutualist-exploiter *Megalomyrmex adamsae*. *Ecol. Entomol.* 37:453–  
496 462.
- 497 Afkhami, M. E., J. A. Rudgers, and J. J. Stachowicz. 2014. Multiple mutualist effects: conflict  
498 and synergy in multispecies mutualisms. *Ecology* 95:833–844.
- 499 Afkhami, M. E., and J. R. Stinchcombe. 2016. Multiple mutualist effects on genomewide  
500 expression in the tripartite association between *Medicago truncatula*, nitrogen-fixing  
501 bacteria and mycorrhizal fungi. *Mol. Ecol.* 25:4946–4962.
- 502 Ågren, J., F. Hellström, P. Toräng, and J. Ehrlén. 2013. Mutualists and antagonists drive among-  
503 population variation in selection and evolution of floral display in a perennial herb. *Proc.*  
504 *Natl. Acad. Sci.* 110:18202–18207.
- 505 Altman, N., and M. Krzywinski. 2015. Points of Significance: Split plot design. *Nat. Methods*  
506 12:165–166.
- 507 Ballhorn, D. J., B. S. Younginger, and S. Kautz. 2014. An aboveground pathogen inhibits  
508 belowground rhizobia and arbuscular mycorrhizal fungi in *Phaseolus vulgaris*. *BMC*  
509 *Plant Biol.* 14:321.
- 510 Barrett, L. G., L. M. Broadhurst, and P. H. Thrall. 2012. Geographic adaptation in plant-soil  
511 mutualisms: Tests using *Acacia* spp. and rhizobial bacteria. *Funct. Ecol.* 26:457–468.
- 512 Bates, D., M. Mächler, B. Bolker, and S. Walker. 2015. Fitting linear mixed-effects models using  
513 lme4. *J. Stat. Softw.* 67:1-48.
- 514 Batstone, R. T., E. M. Dutton, D. Wang, M. Yang, and M. E. Frederickson. 2016. The evolution  
515 of symbiont preference traits in the model legume *Medicago truncatula*. *New Phytol.*  
516 213:1850-1861.
- 517 Bolker, B. M., M. E. Brooks, C. J. Clark, S. W. Geange, J. R. Poulsen, M. H. H. Stevens, and J.-  
518 S. S. White. 2009. Generalized linear mixed models: a practical guide for ecology and  
519 evolution. *Trends Ecol. Evol.* 24:127–35.
- 520 Bronstein, J. L. 1994. Conditional outcomes in mutualistic interactions. *Trends Ecol. Evol.*  
521 9:214–217.
- 522 Bronstein, J. L. 2001a. The costs of mutualism. *Am. Zool.* 41:825–839.
- 523 Bronstein, J. L. 2001b. The exploitation of mutualisms. *Ecol. Lett.* 4:277–287.
- 524 Bronstein, J. L., W. G. Wilson, and W. F. Morris. 2003. Ecological dynamics of mutualist /  
525 antagonist communities. *Am. Nat.* 162:S24–S39.
- 526 Burghardt, L. T., J. Guhlin, C. Lan, C. Junqi, M. J. Sadowsky, R. M. Stupar, N. D. Young, and P.  
527 Tiffin. 2017. Transcriptomic basis of genome by genome variation in a legume-rhizobia  
528 mutualism. *Mol. Ecol.*, doi: 10.1111/mec.14285.
- 529 Busby, P. E., C. Soman, M. R. Wagner, M. L. Friesen, J. Kremer, A. Bennett, M. Morsy, J. A.  
530 Eisen, J. E. Leach, and J. L. Dangl. 2017. Research priorities for harnessing plant  
531 microbiomes in sustainable agriculture. *PLoS Biol.* 15:1–14.
- 532 Chomicki, G., P. S. Ward, and S. S. Renner. 2015. Macroevolutionary assembly of ant / plant  
533 symbioses: *Pseudomyrmex* ants and their ant-housing plants in the Neotropics. *Proc. R.*  
534 *Soc. B* 282:20152200.
- 535 Cook, D. R. 1999. *Medicago truncatula* - A model in the making! *Curr. Opin. Plant Biol.* 2:301–  
536 304.

- 537 Damiani, I., F. Baldacci-Cresp, J. Hopkins, E. Andrio, S. Balzergue, P. Lecomte, A. Puppo, P.  
538 Abad, B. Favery, and D. Hérouart. 2012. Plant genes involved in harbouring symbiotic  
539 rhizobia or pathogenic nematodes. *New Phytol.* 194:511–522.
- 540 Danchin, E. G. J., E. A. Guzeeva, S. Mantelin, A. Berepiki, J. T. Jones, I. S. Agrobiotech, S.  
541 Antipolis, and S. Antipolis. 2016. Horizontal gene transfer from bacteria has enabled the  
542 plant-parasitic nematode *Globodera pallida* to feed on host-derived sucrose. *Mol. Biol.*  
543 *Evol.* 33:1571–1579.
- 544 Danchin, E. G. J., M. Rosso, P. Vieira, J. De Almeida-, P. M. Coutinho, B. Henrissat, P. Abad,  
545 B. Henrissatb, P. Abad, E. G. J. Danchin, M. Rosso, P. Vieira, J. De Almeida-engler, and  
546 P. M. Coutinhob. 2010. Multiple lateral gene transfers and duplications have promoted  
547 plant parasitism ability in nematodes. *Proc. Natl. Acad. Sci.* 107:17651–17656.
- 548 De Román, M., I. Fernández, T. Wyatt, M. Sahrawy, M. Heil, and M. J. Pozo. 2011. Elicitation  
549 of foliar resistance mechanisms transiently impairs root association with arbuscular  
550 mycorrhizal fungi. *J. Ecol.* 99:36–45.
- 551 Dhandaydham, M., L. Charles, H. Zhu, J. L. Starr, T. Huguet, D. R. Cook, J.-M. Prosperi, and C.  
552 Opperman. 2008. Characterization of root-knot nematode resistance in *Medicago*  
553 *truncatula*. *J. Nematol.* 40:46–54.
- 554 Eisenback, J. 2000. Techniques for measuring nematode development and egg production. Pp.  
555 1–4 in T. Wheeler, ed. *Laboratory Techniques in Nematode Ecology*. Society of  
556 Nematologists, Hyatsville, MD.
- 557 Fournier, D. A., H. J. Skaug, J. Ancheta, J. Ianelli, A. Magnusson, M. N. Maunder, A. Nielsen,  
558 and J. Sibert. 2012. AD Model Builder: using automatic differentiation for statistical  
559 inference of highly parameterized complex nonlinear models. *Optim. Methods Softw.*  
560 27:233–249.
- 561 Fox, J., and S. Weisberg. 2011. *An R Companion to Applied Regression*. Second ed. Sage,  
562 Thousand Oaks, CA.
- 563 Fred, E. B., I. L. Baldwin, and E. McCoy. 1932. *Root Nodule Bacteria and Leguminous Plants*.  
564 University of Wisconsin Press, Madison, WI.
- 565 Friesen, M. L. 2013. Microbially mediated plant functional traits. *Mol. Microb. Ecol. Rhizosph.*  
566 1:87–102.
- 567 Garcia, J., D. G. Barker, and E.-P. Journet. 2006. Seed storage and germination. Pp. 1–9 in U.  
568 Mathesius, E. Journet, and L. Sumner, eds. *Medicago truncatula Handbook*. Noble  
569 Research Institute, Ardmore, OK.
- 570 Gomez, J. M. 2003. Herbivory reduces the strength of pollinator-mediated selection in the  
571 Mediterranean herb *Erysimum mediohispanicum*: consequences for plant specialization.  
572 *Am. Nat.* 162:242–256.
- 573 Gomez, J. M. 2005. Non-additive effects of herbivores and pollinators on *Erysimum*  
574 *mediohispanicum* (Cruciferae) fitness. *Oecologia* 143:412–418.
- 575 Goverse, A., and G. Smant. 2014. The activation and suppression of plant innate immunity by  
576 parasitic nematodes. *Annu. Rev. Phytopathol.* 52:243–265.
- 577 Hansen, A. K., and N. A. Moran. 2014. The impact of microbial symbionts on host plant  
578 utilization by herbivorous insects. *Mol. Ecol.* 23:1473–96.
- 579 Harrison, T. L., C. W. Wood, I. L. Borges, and J. R. Stinchcombe. 2017a. No evidence for  
580 adaptation to local rhizobial mutualists in the legume *Medicago lupulina*. *Ecol. Evol.*  
581 7:4367–4376.



- 582 Harrison, T. L., C. W. Wood, K. D. Heath, and J. R. Stinchcombe. 2017b. Geographically  
583 structured genetic variation in the *Medicago lupulina* – *Ensifer* mutualism. *Evolution*  
584 71:1787–1801.
- 585 Heath, K. D. 2010. Intergenomic epistasis and coevolutionary constraint in plants and rhizobia.  
586 *Evolution* 64:1446–1458.
- 587 Heath, K. D., P. V Burke, and J. R. Stinchcombe. 2012. Coevolutionary genetic variation in the  
588 legume-rhizobium transcriptome. *Mol. Ecol.* 21:4735–47.
- 589 Heath, K. D., and J. R. Stinchcombe. 2014. Explaining mutualism variation: a new evolutionary  
590 paradox? *Evolution* 68:309–317.
- 591 Heath, K. D., A. J. Stock, and J. R. Stinchcombe. 2010. Mutualism variation in the nodulation  
592 response to nitrate. *J. Evol. Biol.* 23:2494–2500.
- 593 Heath, K. D., and P. Tiffin. 2009. Stabilizing mechanisms in a legume-rhizobium mutualism.  
594 *Evolution* 63:652–662.
- 595 Hoeksema, J. D. 2010. Ongoing coevolution in mycorrhizal interactions. *New Phytol.* 187:286–  
596 300.
- 597 Huang, Y., J. R. Stinchcombe, and A. F. Agrawal. 2015. Quantitative genetic variance in  
598 experimental fly populations evolving with or without environmental heterogeneity.  
599 *Evolution* 69:2735–2746.
- 600 Irwin, R. E., L. S. Adler, and A. K. Brody. 2004. The dual role of floral traits: pollinator  
601 attraction and plant defense. *Ecology* 85:1503–1511.
- 602 Johnson, M. T. J., S. A. Campbell, and S. C. H. Barrett. 2015. Evolutionary interactions between  
603 plant reproduction and defense against herbivores. *Annu. Rev. Ecol. Evol. Syst.* 46:191–  
604 213.
- 605 Jones, E. I., M. E. Afkhami, E. Akçay, J. L. Bronstein, R. Bshary, M. E. Frederickson, K. D.  
606 Heath, J. D. Hoeksema, J. Ness, M. S. Pankey, S. S. Porter, J. L. Sachs, K. Scharnagl, and  
607 M. L. Friesen. 2015. Cheaters must prosper: reconciling theoretical and empirical  
608 perspectives on cheating in mutualism. *Ecol. Lett.* 18:1270–1284.
- 609 Kersch, M. F., and C. R. Fonseca. 2005. Abiotic factors and the condition outcome of an ant-  
610 plant mutualism. *Ecology* 86:2117–2126.
- 611 Knauer, A. C., and F. P. Schiestl. 2017. The effect of pollinators and herbivores on selection for  
612 floral signals: a case study in *Brassica rapa*. *Evol. Ecol.* 31:285–304.
- 613 Koltai, H., M. Dhandaydham, C. Opperman, J. Thomas, and D. Bird. 2001. Overlapping plant  
614 signal transduction pathways induced by a parasitic nematode and a rhizobial  
615 endosymbiont. *Mol. Plant-Microbe Interact.* 14:1168–1177.
- 616 Lenth, R. V. 2016. Least-Squares Means: The R Package lsmeans. *J. Stat. Softw.* 69:1-33.
- 617 Liere, H., and A. Larsen. 2010. Cascading trait-mediation: disruption of a trait-mediated  
618 mutualism by parasite-induced behavioral modification. *Oikos* 119:1394–1400.
- 619 Miller, R. M. 1993. Nontarget and ecological effects of transgenically altered disease resistance  
620 in crops - possible effects on the mycorrhizal symbiosis. *Mol. Ecol.* 327–335.
- 621 Ness, J. H., W. F. Morris, and J. L. Bronstein. 2006. Integrating quality and quantity of  
622 mutualistic service to contrast ant species protecting *Ferocactus wislizeni*. *Ecology*  
623 87:912–921.
- 624 Nuismer, S. L., and M. Doebeli. 2004. Genetic correlations and the coevolutionary dynamics of  
625 three-species systems. *Evolution* 58:1165–1177.
- 626 Nygaard, S., H. Hu, C. Li, M. Schiøtt, Z. Chen, Z. Yang, Q. Xie, C. Ma, Y. Deng, R. Dikow, C.

- 627 Rabeling, D. R. Nash, W. T. Wcislo, S. G. Brady, T. R. Schultz, G. Zhang, and J. J.  
628 Boomsma. 2016. Reciprocal genomic evolution in the ant-fungus agricultural symbiosis.  
629 Nat. Comm. 7:12233.
- 630 Porter, S. S., and E. L. Simms. 2014. Selection for cheating across disparate environments in the  
631 legume-rhizobium mutualism. Ecol. Lett. 17:1121–1129.
- 632 R Core Team. 2016. R: A language and environment for statistical computing. Vienna, Austria.
- 633 Rey, P. J., A. M. Sa, C. M. Herrera, B. Garcı, J. Guitia, and A. J. Manzaneda. 2002. Interaction  
634 of pollinators and herbivores on plant fitness suggests a pathway for correlated evolution  
635 of mutualism- and antagonism-related traits. Proc. Natl. Acad. 99:16823–16828.
- 636 Sachs, J. L., C. J. Essenberg, and M. M. Turcotte. 2011. New paradigms for the evolution of  
637 beneficial infections. Trends Ecol. Evol. 26:202–209.
- 638 Salem, H., T. O. Onchuru, E. Bauer, and M. Kaltenpoth. 2015. Symbiont transmission entails the  
639 risk of parasite infection. Biol. Lett. 11:20150840.
- 640 Schiestl, F., F. Huber, and M. Gomez. 2011. Phenotypic selection on floral scent: trade-off  
641 between attraction and deterrence ? Evol. Ecol. 25:237–248.
- 642 Schiestl, F. P., H. Kirk, L. Bigler, S. Cozzolino, and G. A. Desurmont. 2014. Herbivory and  
643 floral signaling : phenotypic plasticity and tradeoffs between reproduction and indirect  
644 defense. New Phytol. 257–266.
- 645 Shapira, M. 2016. Gut microbiotas and host evolution: scaling up symbiosis. Trends Ecol. Evol.  
646 31:539-549.
- 647 Siepielski, A. M., and C. W. Benkman. 2009. Conflicting selection from an antagonist and a  
648 mutualist enhances phenotypic variation in a plant. Evolution 64:1120–1128.
- 649 Simonsen, A. K., and J. R. Stinchcombe. 2014a. Herbivory eliminates fitness costs of mutualism  
650 exploiters. New Phytol. 202:651–61.
- 651 Simonsen, A. K., and J. R. Stinchcombe. 2014b. Standing genetic variation in host preference for  
652 mutualist microbial symbionts. Proc. R. Soc. B Biol. Sci. 281:20142036–20142036.
- 653 Smith, K. P., and R. M. Goodman. 1999. Host variation for interactions with beneficial plant-  
654 associated microbes. Annu. Rev. Phytopathol. 37:473–491.
- 655 Stanton-Geddes, J., T. Paape, B. Epstein, R. Briskine, J. Yoder, J. Mudge, A. Bharti, A. Farmer,  
656 P. Zhou, R. Denny, G. May, S. Erlandson, M. Yakub, M. Sugawara, M. Sadowsky, N.  
657 Young, and P. Tiffin. 2013a. Data from: Candidate genes and genetic architecture of  
658 symbiotic and agronomic traits revealed by whole-genome, sequence-based association  
659 genetics in *Medicago truncatula*.
- 660 Stanton-Geddes, J., T. Paape, B. Epstein, R. Briskine, J. Yoder, J. Mudge, A. K. Bharti, A. D.  
661 Farmer, P. Zhou, R. Denny, G. D. May, S. Erlandson, M. Yakub, M. Sugawara, M. J.  
662 Sadowsky, N. D. Young, and P. Tiffin. 2013b. Candidate genes and genetic architecture  
663 of symbiotic and agronomic traits revealed by whole-genome, sequence-based  
664 association genetics in *Medicago truncatula*. PLoS One 8:1–9.
- 665 Strauss, S. Y., and R. E. Irwin. 2004. Ecological and evolutionary consequences of multispecies  
666 plant-animal interactions. Annu. Rev. Ecol. Evol. Syst. 35:435–466.
- 667 Strauss, S. Y., J. A. Rudgers, J. A. Lau, R. E. Irwin, S. Y. Strauss, J. A. Rudgers, J. A. Lau, and  
668 R. E. Irwin. 2002. Direct and ecological costs of resistance to herbivory. Trends Ecol.  
669 Evol. 17:278–285.
- 670 Thompson, J. N. 2005. The Geographic Mosaic of Coevolution. The University of Chicago  
671 Press, Chicago, IL.

- 672 Toth, R., D. Toth, D. Starke, and D. Smith. 1990. Vesicular-arbuscular mycorrhizal colonization  
673 in *Zea mays* affected by breeding for resistance to fungal pathogens. *Can. J. Bot.*  
674 68:1039–1044.
- 675 Weerasinghe, R. R., D. M. Bird, and N. S. Allen. 2005. Root-knot nematodes and bacterial Nod  
676 factors elicit common signal transduction events in *Lotus japonicus*. *Proc. Natl. Acad.*  
677 *Sci. U. S. A.* 102:3147–3152.
- 678 Wickham, H. 2009. *ggplot2: Elegant Graphics for Data Analysis*. Springer-Verlag, New York,  
679 NY.
- 680 Zust, T., and A. Agrawal. 2017. Plant chemical defense indirectly mediates aphid performance  
681 via interactions with tending ants. *Ecology* 98:601–607.
- 682

683 **Tables and Figures**

684 Table 1. Effect of treatment (nematode presence or absence), plant genotype, and the treatment ×  
685 genotype interaction on nodule traits.

|            | Nodule number   |                  | Mean nodule mass |                  | Total nodule mass |                  |
|------------|-----------------|------------------|------------------|------------------|-------------------|------------------|
|            | $\chi^2_{df=1}$ | <i>P</i>         | $\chi^2_{df=1}$  | <i>P</i>         | $\chi^2_{df=1}$   | <i>P</i>         |
| Treatment  | 14.77           | <b>&lt;0.001</b> | 2.66             | 0.103            | 19.48             | <b>&lt;0.001</b> |
| Genotype   | -               | <b>&lt;0.001</b> | 24.67            | <b>&lt;0.001</b> | 13.39             | <b>&lt;0.001</b> |
| Trt × Geno | -               | <b>0.022</b>     | 0                | 1.000            | 3.51              | 0.060            |

686 We do not report  $\chi^2$  values for the genotype and the treatment × genotype interaction for nodule  
687 number because glmmADMB models do not return  $\chi^2$  values for random effects. We used  
688 glmmADMB for the nodule number analysis to accommodate zero-inflation and overdispersion  
689 (see Methods).

690

691 Table 2. Effect of treatment (nematode presence or absence), plant genotype, and the treatment ×  
692 genotype interaction on plant traits. Top: Aboveground biomass, flowering time, and total fruit  
693 mass.

|            | Aboveground biomass |                  | Flowering time  |                  | Total fruit mass |                  |
|------------|---------------------|------------------|-----------------|------------------|------------------|------------------|
|            | $\chi^2_{df=1}$     | <i>P</i>         | $\chi^2_{df=1}$ | <i>P</i>         | $\chi^2_{df=1}$  | <i>P</i>         |
| Treatment  | 0.47                | 0.495            | 0.66            | 0.417            | 2.76             | 0.096            |
| Genotype   | 56.33               | <b>&lt;0.001</b> | 17.90           | <b>&lt;0.001</b> | 5.65             | <b>&lt;0.001</b> |
| Trt × Geno | 3.55                | 0.059            | 0               | 1.000            | 0.03             | 0.859            |

694

695

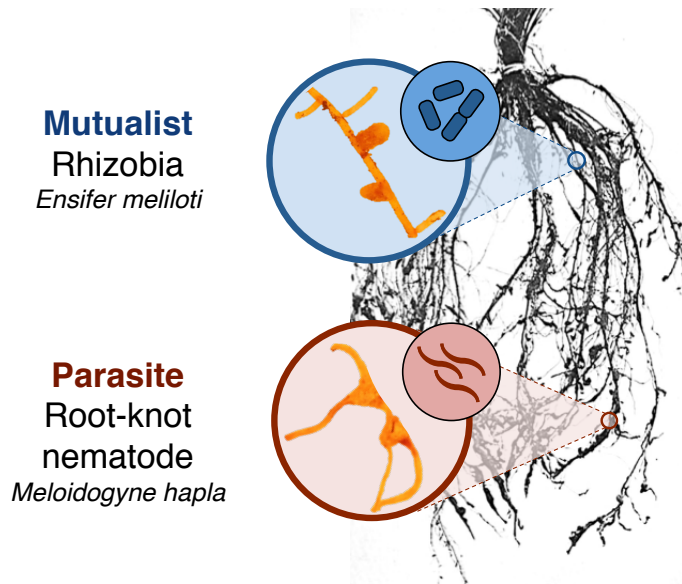

696

697 Figure 1. Nodules formed by mutualistic rhizobia (top) and galls formed by parasitic nematodes  
698 (bottom) on legume roots. Each gall contains one female nematode. Root image adapted from an  
699 image by L.T. Leonard (Fred et al. 1932).

700

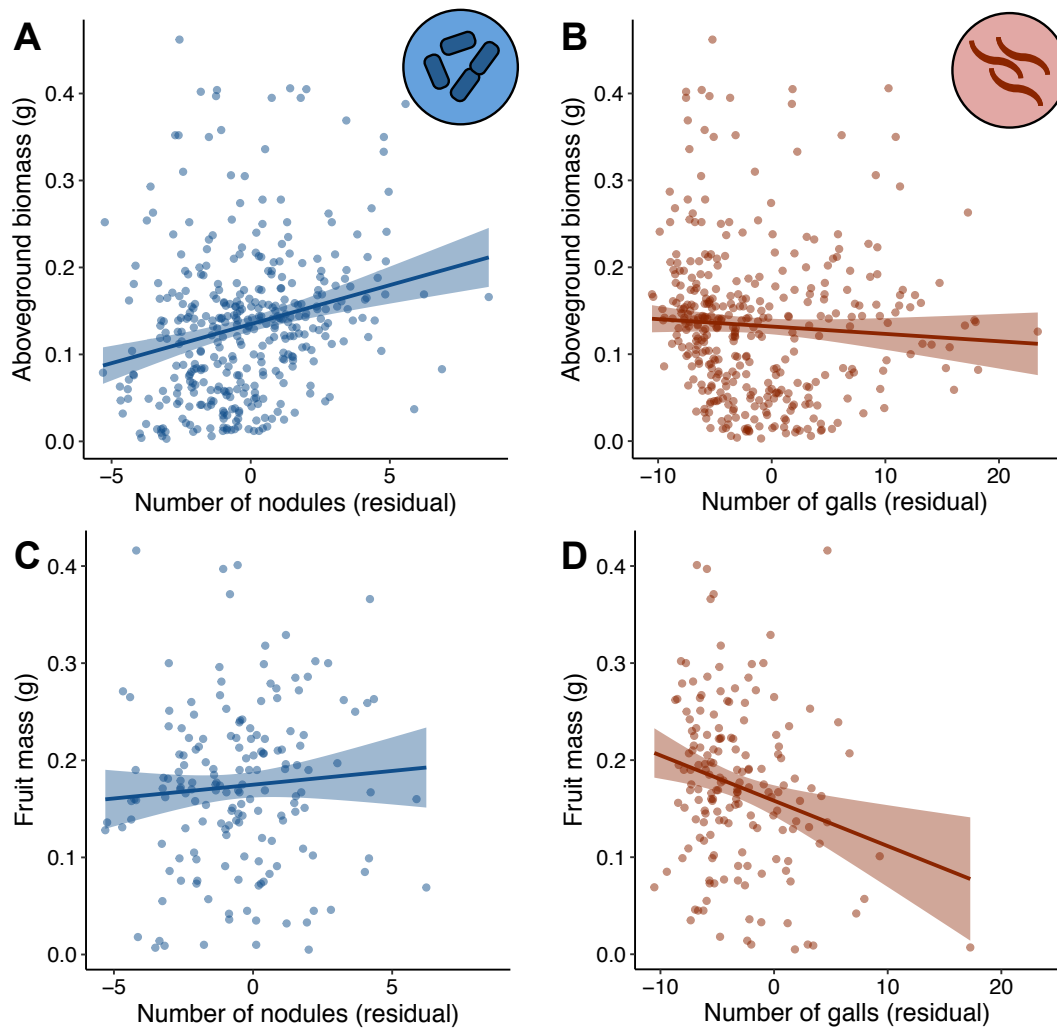

701  
 702 Figure 2. Rhizobia and nematodes affect different plant fitness components in co-infected plants.  
 703 (A and C) The relationship between nodule number and aboveground biomass (A), and nodule  
 704 number and fruit mass (C). (B and D) The relationship between gall number aboveground  
 705 biomass (B), and gall number and fruit mass (D). Bands are standard errors. The negative  
 706 relationship in (D) remained significant when the point in the lower right-hand corner was  
 707 removed.  
 708

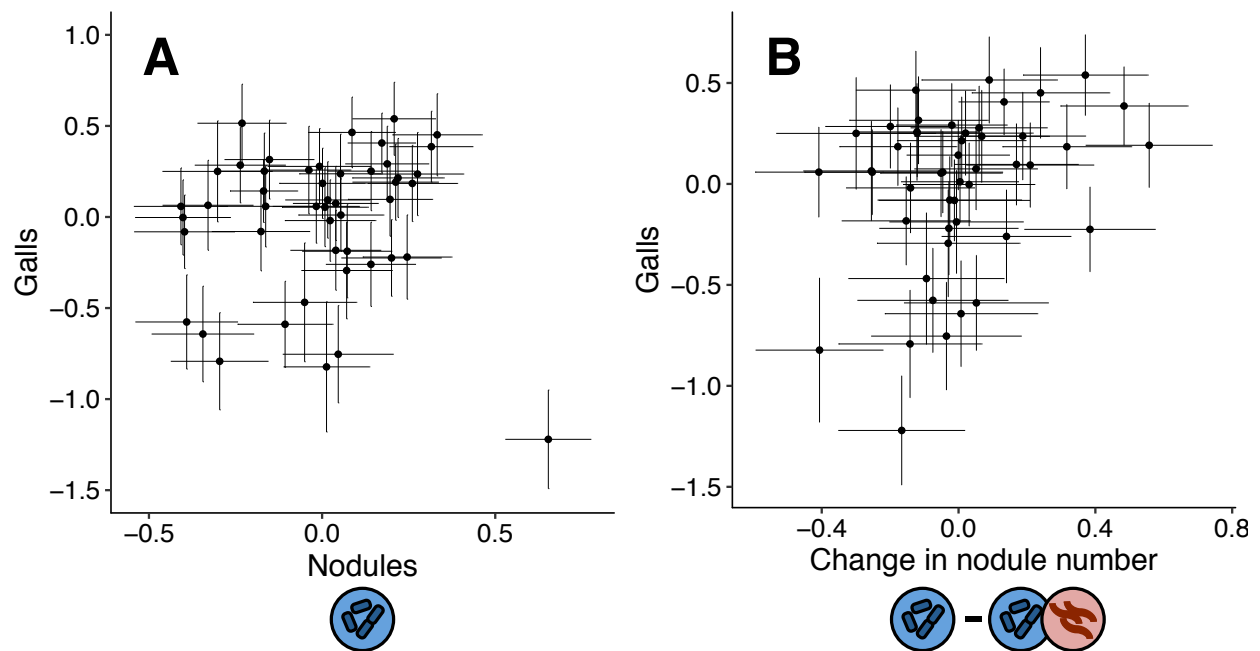

709

710 Figure 3. Genetic correlation between the number of galls and nodules that plants produce.

711 Points are conditional modes (BLUPs) for each plant genotype  $\pm$  SE. (A) Genetic correlation

712 between gall number and the number of nodules produced by plants in the absence of nematodes.

713 There is a significant positive correlation when the outlier in the lower right-hand corner is

714 excluded ( $r = 0.30$ ,  $P = 0.039$ ), but not when it is included ( $r = 0.06$ ,  $P = 0.710$ ).

715 (B) Genetic correlation between gall number and the change in nodule number in the absence and presence of

716 nematodes ( $r = 0.31$ ,  $P = 0.034$ ). Excluding HM170 did not qualitatively change this result ( $r =$

717  $0.29$ ,  $P = 0.052$ ). We used a resampling approach to generate the standard errors on the change in

718 nodule number in panel B.

719

720

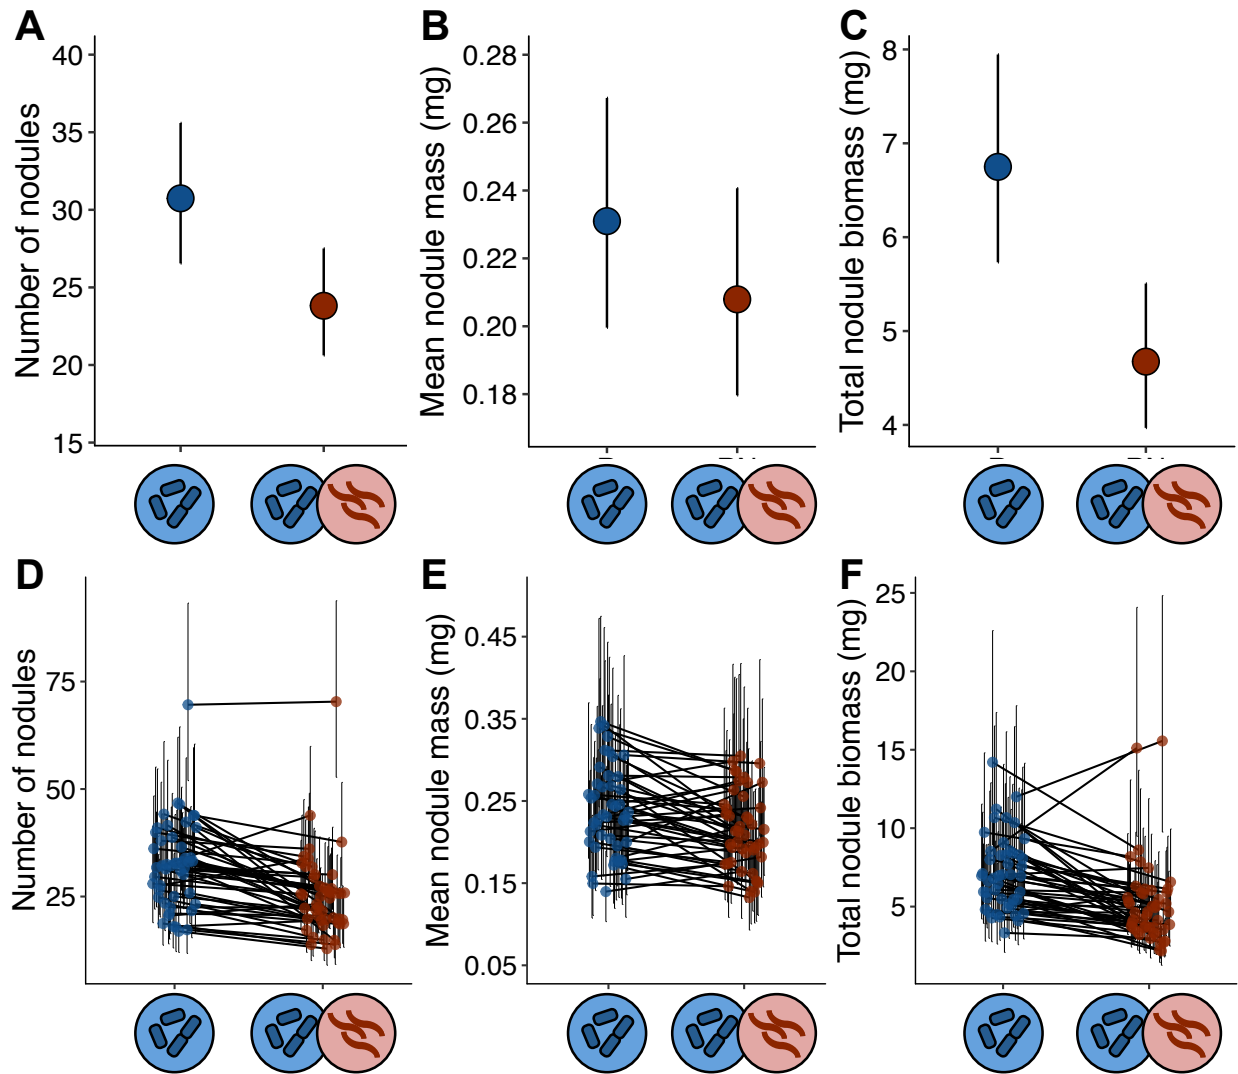

721

722 Figure 4. Nematodes affect the nodule phenotypes. Number of nodules (A), mean nodule mass

723 (B), and total nodule biomass (number of nodules  $\times$  mean nodule mass) in nematode-infected

724 and -uninfected plants. In A-C, points are least-squares treatment means  $\pm$ 95% CIs. (D-F)

725 Genotype-by treatment interactions for number of nodules (D), mean nodule mass (E), and total

726 nodule biomass (F). In each treatment, points are least-squares genotype means  $\pm$ 95% CIs; lines

727 connect the same genotype in the two treatments.

728
